# Supplementary material for: Breast cancer risk factors and mammographic density among high-risk women in urban China
Source: PubMed Central journal article supplement (PMC5802809; doi:10.1038/s41523-018-0055-9), 2018-02-06
Supplement: 41523_2018_55_MOESM2_ESM.pdf [file 41523_2018_55_MOESM2_ESM.pdf]

Supplementary Table 1. Demographic characteristics, anthropometric measures, reproductive and lifestyle factors among participants of the Chinese breast cancer screening program by menopausal status

|                                                        | Premenopausal        |      |                      |      |                       | Postmenopausal       |      |                      |      |                       |
|--------------------------------------------------------|----------------------|------|----------------------|------|-----------------------|----------------------|------|----------------------|------|-----------------------|
|                                                        | BI-RADS 1-2 (n=1253) |      | BI-RADS 3-4 (n=2847) |      | <i>P</i> <sup>a</sup> | BI-RADS 1-2 (n=4169) |      | BI-RADS 3-4 (n=3209) |      | <i>P</i> <sup>a</sup> |
|                                                        | N                    | %    | N                    | %    |                       | N                    | %    | N                    | %    |                       |
| <b>Age</b>                                             |                      |      |                      |      |                       |                      |      |                      |      |                       |
| Mean (SD)                                              | 50.2                 | 4.69 | 48.6                 | 3.30 | <1.0E-30              | 58.5                 | 5.37 | 55.7                 | 5.24 | <1.0E-30              |
| 45-49                                                  | 654                  | 52.2 | 1883                 | 66.1 | 1.8E-25               | 159                  | 3.8  | 320                  | 10.0 | <1.0E-30              |
| 50-59                                                  | 520                  | 41.5 | 920                  | 32.3 |                       | 2205                 | 52.9 | 2115                 | 65.9 |                       |
| 60-69                                                  | 79                   | 6.3  | 44                   | 1.6  |                       | 1805                 | 43.3 | 774                  | 24.1 |                       |
| <b>Family history of breast and/or ovarian cancers</b> |                      |      |                      |      |                       |                      |      |                      |      |                       |
| No                                                     | 645                  | 51.5 | 1582                 | 55.6 | 0.009                 | 2045                 | 49.1 | 1525                 | 47.5 | 0.41                  |
| 1st or 2nd degree relatives <sup>b</sup>               | 228                  | 18.2 | 528                  | 18.6 |                       | 812                  | 19.5 | 637                  | 19.9 |                       |
| 1st degree relatives with                              | 380                  | 30.3 | 734                  | 25.8 |                       | 1311                 | 31.5 | 1047                 | 32.6 |                       |
| Missing                                                |                      |      | 3                    |      |                       | 1                    |      |                      |      |                       |
| <b>Education</b>                                       |                      |      |                      |      |                       |                      |      |                      |      |                       |
| None-Elementary                                        | 108                  | 8.6  | 158                  | 5.6  | 6.2E-09               | 781                  | 18.7 | 322                  | 10.0 | <1.0E-30              |
| Middle school                                          | 380                  | 30.3 | 748                  | 26.3 |                       | 1343                 | 32.2 | 934                  | 29.1 |                       |
| High school                                            | 460                  | 36.7 | 995                  | 35.0 |                       | 1386                 | 33.3 | 1213                 | 37.8 |                       |
| College+                                               | 305                  | 24.3 | 946                  | 33.2 |                       | 659                  | 15.8 | 740                  | 23.1 |                       |
| <b>Body mass index (kg/m<sup>2</sup>)</b>              |                      |      |                      |      |                       |                      |      |                      |      |                       |
| Mean (SD)                                              | 24.6                 | 3.06 | 23.5                 | 2.82 | 6.2E-25               | 24.7                 | 3.05 | 23.7                 | 2.90 | <1.0E-30              |
| <23                                                    | 380                  | 32.1 | 1246                 | 45.3 | 1.2E-20               | 1222                 | 30.7 | 1340                 | 43.5 | <1.0E-30              |
| 23-24.9                                                | 308                  | 26.0 | 755                  | 27.5 |                       | 1026                 | 25.8 | 838                  | 27.2 |                       |
| 25+                                                    | 496                  | 41.9 | 749                  | 27.2 |                       | 1730                 | 43.5 | 901                  | 29.3 |                       |
| Missing                                                | 69                   |      | 97                   |      |                       | 191                  |      | 130                  |      |                       |
| <b>Weight (kg)</b>                                     |                      |      |                      |      |                       |                      |      |                      |      |                       |
| Mean (SD)                                              | 63.2                 | 8.15 | 60.6                 | 7.83 | 3.0E-21               | 62.7                 | 8.15 | 60.3                 | 7.94 | <1.0E-30              |
| Missing                                                | 50                   |      | 49                   |      |                       | 114                  |      | 68                   |      |                       |
| <b>Height (cm)</b>                                     |                      |      |                      |      |                       |                      |      |                      |      |                       |
| Mean (SD)                                              | 160.3                | 4.54 | 160.3                | 4.34 | 0.93                  | 159.5                | 4.59 | 159.7                | 4.52 | 0.02                  |
| Missing                                                |                      |      |                      |      |                       |                      |      |                      |      |                       |
| <b>Age at menarche</b>                                 |                      |      |                      |      |                       |                      |      |                      |      |                       |
| <13                                                    | 185                  | 14.8 | 430                  | 15.1 | 0.003                 | 365                  | 8.8  | 354                  | 11.1 | 1.3E-08               |
| 13-14                                                  | 551                  | 44.1 | 1397                 | 49.2 |                       | 1780                 | 42.8 | 1517                 | 47.4 |                       |
| 15+                                                    | 514                  | 41.1 | 1014                 | 35.7 |                       | 2013                 | 48.4 | 1333                 | 41.6 |                       |
| Missing                                                | 3                    |      | 6                    |      |                       | 11                   |      | 5                    |      |                       |
| <b>Parity</b>                                          |                      |      |                      |      |                       |                      |      |                      |      |                       |
| Never                                                  | 67                   | 5.4  | 193                  | 6.8  | 0.08                  | 199                  | 4.8  | 224                  | 7.0  | 5.3E-05               |
| Ever                                                   | 1186                 | 94.7 | 2654                 | 93.2 |                       | 3970                 | 95.2 | 2985                 | 93.0 |                       |
| <b>Age at first full term birth<sup>c</sup></b>        |                      |      |                      |      |                       |                      |      |                      |      |                       |
| <25                                                    | 436                  | 36.9 | 866                  | 32.7 | 0.03                  | 1297                 | 32.8 | 901                  | 30.3 | 0.12                  |
| 25-26                                                  | 392                  | 33.1 | 879                  | 33.2 |                       | 1229                 | 31.1 | 933                  | 31.3 |                       |
| 27-28                                                  | 192                  | 16.2 | 468                  | 17.7 |                       | 821                  | 20.8 | 655                  | 22.0 |                       |
| 29+                                                    | 163                  | 13.8 | 433                  | 16.4 |                       | 609                  | 15.4 | 490                  | 16.5 |                       |
| Missing                                                | 3                    |      | 8                    |      |                       | 14                   |      | 6                    |      |                       |
| <b>Breastfeeding<sup>c</sup></b>                       |                      |      |                      |      |                       |                      |      |                      |      |                       |
| No breastfeeding                                       | 222                  | 18.7 | 509                  | 19.2 | 0.02                  | 597                  | 15.0 | 542                  | 18.2 | 2.1E-12               |
| 1-6 months                                             | 253                  | 21.3 | 474                  | 17.9 |                       | 602                  | 15.2 | 537                  | 18.0 |                       |
| 7-12 months                                            | 449                  | 37.9 | 1122                 | 42.3 |                       | 1511                 | 38.1 | 1194                 | 40.0 |                       |
| 13 months+                                             | 262                  | 22.1 | 549                  | 20.7 |                       | 1260                 | 31.7 | 712                  | 23.9 |                       |
| <b>Age at menopause among postmenopausal women</b>     |                      |      |                      |      |                       |                      |      |                      |      |                       |
| <49                                                    | -                    | -    | -                    | -    | -                     | 1530                 | 36.7 | 1236                 | 38.5 | <1.0E-30              |
| 49-50                                                  | -                    | -    | -                    | -    |                       | 1454                 | 34.9 | 1159                 | 36.1 |                       |
| 51+                                                    | -                    | -    | -                    | -    |                       | 1184                 | 28.4 | 813                  | 25.3 |                       |
| Missing                                                |                      |      |                      |      |                       | 1                    |      | 1                    |      |                       |
| <b>Smoking</b>                                         |                      |      |                      |      |                       |                      |      |                      |      |                       |
| Never                                                  | 1103                 | 88.0 | 2471                 | 86.8 | 0.23                  | 3667                 | 88.0 | 2767                 | 86.2 | 0.01                  |
| Current                                                | 131                  | 10.5 | 343                  | 12.1 |                       | 409                  | 9.8  | 381                  | 11.9 |                       |
| Former                                                 | 19                   | 1.5  | 33                   | 1.2  |                       | 93                   | 2.2  | 61                   | 1.9  |                       |
| <b>Alcohol consumption</b>                             |                      |      |                      |      |                       |                      |      |                      |      |                       |
| Never                                                  | 889                  | 71.0 | 2047                 | 71.9 | 0.51                  | 3171                 | 76.1 | 2349                 | 73.2 | 0.01                  |
| Current                                                | 311                  | 24.8 | 700                  | 24.6 |                       | 881                  | 21.1 | 748                  | 23.3 |                       |
| Former                                                 | 53                   | 4.2  | 100                  | 3.5  |                       | 116                  | 2.8  | 112                  | 3.5  |                       |
| Missing                                                |                      |      |                      |      |                       | 1                    |      |                      |      |                       |
| <b>Regular tea drinking</b>                            |                      |      |                      |      |                       |                      |      |                      |      |                       |
| No                                                     | 599                  | 51.7 | 1547                 | 59.5 | 8.3E-06               | 2154                 | 56.4 | 1787                 | 61.0 | 1.2E-04               |
| Yes                                                    | 559                  | 48.3 | 1052                 | 40.5 |                       | 1667                 | 43.6 | 1141                 | 39.0 |                       |
| Missing                                                | 95                   |      | 248                  |      |                       | 348                  |      | 281                  |      |                       |

<sup>a</sup>Results from one-way analysis of variance (ANOVA) for continuous variables and chi-squared test for categorical variables

<sup>b</sup>Excluding women with first-degree relatives with breast cancer < 50 years

<sup>c</sup>Parous women only
