# Supplementary material for: Breast cancer risk factors and mammographic density among high-risk women in urban China
Source: PubMed Central journal article supplement (PMC5802809; doi:10.1038/s41523-018-0055-9), 2018-02-06
Supplement: 41523_2018_55_MOESM3_ESM.pdf [file 41523_2018_55_MOESM3_ESM.pdf]

Supplementary Table 2. Distribution of age and menopausal status by provinces

| Provinces | N     | %    | Age  |      | Menopausal status (%) |               | BI-RADS Score (%) |      |      |     |
|-----------|-------|------|------|------|-----------------------|---------------|-------------------|------|------|-----|
|           |       |      | Mean | SD   | Premenopause          | Postmenopause | 1                 | 2    | 3    | 4   |
| Beijing   | 682   | 5.94 | 55.3 | 6.25 | 29.3                  | 70.7          | 7.8               | 44.9 | 44.3 | 3.1 |
| Chongqi   | 1205  | 10.5 | 55.5 | 6.51 | 29.0                  | 71.0          | 7.3               | 27.7 | 56.7 | 8.3 |
| Gansu     | 995   | 8.67 | 53.1 | 5.99 | 38.1                  | 61.9          | 18.5              | 50.2 | 30.1 | 1.3 |
| Hebei     | 723   | 6.3  | 54.1 | 6.41 | 39.8                  | 60.2          | 3.5               | 24.3 | 71.7 | 0.6 |
| Heilong   | 1343  | 11.7 | 53.8 | 5.93 | 42.1                  | 57.9          | 4.6               | 41.7 | 53.4 | 0.3 |
| Henan     | 833   | 7.26 | 54.1 | 6.38 | 37.7                  | 62.3          | 3.1               | 20.5 | 68.4 | 7.9 |
| Hunan     | 1164  | 10.1 | 55.1 | 6.60 | 32.7                  | 67.4          | 6.7               | 38.3 | 52.1 | 2.9 |
| Jiangsu   | 674   | 5.87 | 54.6 | 6.13 | 31.5                  | 68.6          | 1.3               | 37.7 | 57.3 | 3.7 |
| Shandon   | 1359  | 11.8 | 55.4 | 6.07 | 30.1                  | 69.9          | 34.4              | 44.2 | 20.5 | 0.9 |
| Xinjian   | 1401  | 12.2 | 52.8 | 6.23 | 41.9                  | 58.1          | 8.4               | 37.3 | 53.0 | 1.3 |
| Zhejian   | 1099  | 9.57 | 54.6 | 6.46 | 37.9                  | 62.1          | 8.7               | 31.6 | 57.6 | 2.1 |
| Total     | 11478 | 100  | 54.4 | 6.30 | 35.7                  | 64.3          | 10.5              | 36.7 | 50.0 | 2.8 |
