# Supplementary material for: Breast cancer risk factors and mammographic density among high-risk women in urban China
Source: PubMed Central journal article supplement (PMC5802809; doi:10.1038/s41523-018-0055-9), 2018-02-06
Supplement: 41523_2018_55_MOESM4_ESM.pdf [file 41523_2018_55_MOESM4_ESM.pdf]

Supplementary Table 3. Associations between selected characteristics and mammographic density (BI-RADS 3-4 versus BI-RADS 1-2)

|                                                    | OR (95% CI) <sup>a</sup> | P        |
|----------------------------------------------------|--------------------------|----------|
| Age                                                |                          |          |
| Per 2 years                                        | 0.81 (0.79- 0.82)        | <1.0E-30 |
| Family history of breast and ovarian cancers       |                          |          |
| 1st or 2nd degree relatives <sup>b</sup>           | 1.03 (0.91- 1.16)        | 0.65     |
| 1st degree relatives with breast cancer < 50 years | 0.91 (0.82- 1.02)        | 0.09     |
| Education                                          |                          |          |
| Middle school vs. None-Elementary                  | 1.46 (1.25- 1.70)        | 1.40E-06 |
| High school vs. None-Elementary                    | 1.64 (1.40- 1.91)        | 3.30E-10 |
| College+ vs. None-Elementary                       | 2.17 (1.83- 2.56)        | 1.50E-19 |
| Body mass index (kg/m <sup>2</sup> )               |                          |          |
| Per 2kg/m <sup>2</sup>                             | 0.81 (0.78- 0.83)        | <1.0E-30 |
| Height (cm) <sup>c</sup>                           |                          |          |
| Per 2 cm                                           | 1.08 (1.06- 1.10)        | 1.90E-12 |
| Weight (kg) <sup>c</sup>                           |                          |          |
| Per 2 kg                                           | 0.92 (0.91- 0.93)        | <1.0E-30 |
| Age at menarche                                    |                          |          |
| 13-14 vs. <13                                      | 0.95 (0.82- 1.09)        | 0.47     |
| 15+ vs. <13                                        | 0.89 (0.77- 1.03)        | 0.13     |
| Parity                                             |                          |          |
| Parous vs. Nulliparous                             | 0.81 (0.67- 0.98)        | 0.03     |
| Age at first full term birth <sup>d</sup>          |                          |          |
| 25-26 vs. <25                                      | 1.11 (0.99- 1.24)        | 0.07     |
| 27-28 vs. <25                                      | 1.19 (1.04- 1.35)        | 0.01     |
| 29+ vs. <25                                        | 1.30 (1.13- 1.50)        | 3.60E-04 |
| Breastfeeding <sup>d</sup>                         |                          |          |
| 1-6 months vs. No breastfeeding                    | 1.02 (0.88- 1.19)        | 0.78     |
| 7-12 months vs. No breastfeeding                   | 1.08 (0.95- 1.23)        | 0.22     |
| 13 months+ vs. No breastfeeding                    | 0.86 (0.74- 0.99)        | 0.04     |
| Menopausal status                                  |                          |          |
| Post- vs. Premenopausal                            | 0.73 (0.65- 0.82)        | 4.10E-08 |

<sup>a</sup>Logistic regression was used to estimate ORs and 95% CIs comparing the dense (BI-RADS = 3, 4) to non-dense breast group (BI-RADS=1, 2). Adjusted for province, age (per 2-year), family history, education, BMI (per 2 kg/m<sup>2</sup>), age at menarche, parity, and menopausal status.

<sup>b</sup>Excluding women with first-degree relatives with breast cancer < 50 years.

<sup>c</sup>BMI (per 2 kg/m<sup>2</sup>) was replaced with height (per 2 cm) and weight (per 2 kg) in the model.

<sup>d</sup>Parous women only. Model was adjusted for province, age (2-year frequency), family history, education, BMI (per 2 kg/m<sup>2</sup>), age at menarche, age at first full term birth, breastfeeding, and menopausal status.
